# Supplementary material for: A highly sensitive and specific SARS-CoV-2 spike- and nucleoprotein-based fluorescent multiplex immunoassay (FMIA) to measure IgG, IgA and IgM class antibodies
Source: medRxiv preprint, doi:10.1101/2021.07.28.21260990, version 1 (2021-07-30)
Supplement: Figure S1 [file 260990_file04.docx]

Supplementary Figure S1. Distribution of positive serum panel’s days post-onset of symptoms at the time of sample collection.
